# Supplementary material
Source: publisher figshare collection journal article supplement (https://gsajournals.figshare.com/ndownloader/files/35026387)
Supplement: Supplementary file 1 [file 35026387]

## Sheet: Sheet1
Chromosome	Size in ZF (MB)	Number of mapped DArT tags
1	114.56	8883
1A	70.43	5280
1B	1.1	42
2	150.69	11401
3	113.23	9981
4	71.55	5211
4A	62.01	2457
5	19.82	4740
6	35.67	2749
7	38.06	3223
8	32.61	2260
9	25.58	2304
10	22.02	1661
11	21.01	1808
12	20.44	1923
13	18.28	1341
14	16.67	1479
15	14.33	1072
16	1.22	4
17	11.69	785
18	11.04	774
19	8.58	896
20	15.68	1182
21	8.89	333
22	5.5	95
23	6.83	285
24	7.67	314
25	3.02	92
26	6.86	252
27	5.43	207
28	6.09	210
LGE2	0.11	8
LGE5	0.02	0
LGE22	0.88	26
Z	75.46	4615
